# Supplementary material
Source: PubMed Central journal article supplement (PMC6779458)
Supplement: JB.00451-19-s0001.pdf [file JB.00451-19-s0001.pdf]

## Supplementary material

**Table S1.** Primers used in this work. To allow assembly of the PCR fragments, primers B and C contain sequences overlapping each other.

| Gene                                                           | Primer name                                     | Sequence (5'-3')                                   | Template |
|----------------------------------------------------------------|-------------------------------------------------|----------------------------------------------------|----------|
| <b>Deletion mutants</b>                                        |                                                 |                                                    |          |
| NVH-1387 ( <i>Ynd operon</i> )                                 | A 1586 <i>yndDSLICA</i>                         | GCTTGAGCAGACATTGCTTG                               | NVH-1378 |
|                                                                | B 1799 <i>YndD-E<sub>1</sub>SLIC _B</i>         | GAACCTCTACATGCCACTCACTCATCC                        |          |
|                                                                | C 1800 <i>YndD-E<sub>1</sub>SLIC _C</i>         | AGTGGCATGTAGAGGTTGAGCC                             |          |
|                                                                | D 1669 <i>YndE<sub>1</sub>_D</i>                | TATGATCGTCGTCGGCTTGG                               |          |
| NVH-1412 ( <i>gerKACB</i> )                                    | A 1549 <i>gerKoppf</i>                          | ACGAGGTTATCGGCAATACG                               | NVH-1387 |
|                                                                | B 1952 <i>gerKBslicB</i>                        | CGGGAAGGATCACATATTTTTCCTTG                         |          |
|                                                                | C 1953 <i>gerKBslicC</i>                        | AGGAAAAATATGTGATCCTTCCCGCT                         |          |
|                                                                | D 1954 <i>gerKBslicD</i>                        | CGAGTCCCATAAAAACAAG                                |          |
| NVH-1404 (1387Δ <i>gerKA-C</i> )                               | A 1549 <i>gerKoppf</i>                          | ACGAGGTTATCGGCAATACG                               | NVH-1387 |
|                                                                | B 1562 <i>gerKslicB</i>                         | TCTTTTCATTACATATTTTTCCTTGCCGAAGC                   |          |
|                                                                | C 1563 <i>gerKslicC</i>                         | AAGGAAAAATATGTGAATGAAAGAGAGAGGAGG                  |          |
|                                                                | D 1564 <i>gerKD2rev</i>                         | TTTCCAAGAATGGGCAAAAG                               |          |
| NVH-1389 ( <i>gerAB</i> )                                      | A 1807 <i>gerAB-A</i>                           | AGCGTGATTATGGAAGTGACGAT                            | MW3      |
|                                                                | B 1808 <i>gerAB-B</i>                           | CTTTTTTTTCATGAAGAACTACATGCGCCGAGCATTGTGCTGG        |          |
|                                                                | C 1809 <i>gerAB-C</i>                           | CAATGCTCGGCGCATGTAGTTCTTCATGAAAAAAGGGAAT           |          |
|                                                                | D 1810 <i>gerAB-D</i>                           | GCTCCTCTGAGAAAATCAGGACTTGC                         |          |
| NVH-1369 ( <i>yndE<sub>3</sub></i> )                           | A 1658 <i>YndE<sub>3</sub>_A</i>                | GCGCTCATTATGGAAGTGGC                               | MW3      |
|                                                                | B 1659 <i>YndE<sub>3</sub>_B</i>                | CAAGCGTCACATAAGCGTTTCCCT                           |          |
|                                                                | C 1660 <i>YndE<sub>3</sub>_C</i>                | AACGCTTATGTGACGCTTAAAAAGA                          |          |
|                                                                | D 1661 <i>YndE<sub>3</sub>_D</i>                | GGCTTGATCCCTTCCCGAG                                |          |
| NVH-1378 ( <i>yndE<sub>3</sub>E<sub>2</sub></i> )              | A 1658 <i>YndE<sub>3</sub>_A</i>                | GCGCTCATTATGGAAGTGGC                               | NVH-1369 |
|                                                                | B 1841 <i>Ynd_E<sub>3</sub>-E<sub>2</sub>_B</i> | TTCCTCCTCACTTACATAAAGCGTTCCCT                      |          |
|                                                                | C 1842 <i>YndE<sub>3</sub>-E<sub>2</sub>_C</i>  | AGGAAAACGCTTATGTAAGTGAGGAGGAAAAAGT                 |          |
|                                                                | D 1665 <i>YndE<sub>2</sub>_D</i>                | CATTTTCAACGATTTTAAGC                               |          |
| NVH-1405 ( <i>yndE<sub>3</sub>E<sub>2</sub>E<sub>1</sub></i> ) | A 1666 <i>YndE<sub>1</sub>_A</i>                | CATCGAAAGGGGATTGGGG                                | NVH-1378 |
|                                                                | B 1667 <i>YndE<sub>1</sub>_B</i>                | GAACCTCTACATTGCGCGTTTCTC                           |          |
|                                                                | C 1668 <i>YndE<sub>1</sub>_C</i>                | CGCGCAATGTAGAGGTTGAGCC                             |          |
|                                                                | D 1669 <i>YndE<sub>1</sub>_D</i>                | TATGATCGTCGTCGGCTTGG                               |          |
| NVH-1371 ( <i>yndF<sub>2</sub></i> )                           | A 1628 <i>YndF<sub>2</sub>-A</i>                | GCCGTCACCGTGAATAAGGA                               | MW3      |
|                                                                | B 1630 <i>YndF<sub>2</sub>-B</i>                | GATTAAGCTACATGATCCCC                               |          |
|                                                                | C 1631 <i>YndF<sub>2</sub>-C</i>                | GGGATCATGTAGCTTAATCATGA                            |          |
|                                                                | D 1629 <i>YndF<sub>2</sub>-D</i>                | TGCCTTTCAGATGACCTTTTACC                            |          |
| <b>RT-PCR</b>                                                  | <i>rpoBf/rpoBr</i>                              | ACCTTCTTATCAGTGGTTTCTTGAT / CCTCAATTGGCGATATGTCTTG | MW3      |
|                                                                | <i>yndD</i> 1697/1698                           | GCGGTCGGCTTTACAGA / CCGTGTGCTCAAAAAGG              |          |
|                                                                | <i>yndE<sub>3</sub></i> 1695/1696               | CGAAGAGCGCATCACCATT / TGTCCCAAGCAGGAAATTGG         |          |
|                                                                | <i>yndE<sub>2</sub></i> 1693/1694               | CCCCGACAAAACGCTATATCA / AAAGTCTCCCGGCCACTT         |          |
|                                                                | <i>yndF<sub>1</sub></i> 1699/1700               | ATTGCTGTGCGAACTGCTAGA / TACTGCTCGGCTGATTCA         |          |
|                                                                | <i>yndE<sub>1</sub></i> 1691/1692               | TGCCAAGAACCCTGTAGAAG / GCCTAATAGGACGGAAATCCATAC    |          |
|                                                                | <i>yndF<sub>2</sub></i> 1701/1702               | GCCATGTCAGTCGATCACCTT / TGAGAGCGGTTTCTTTGA         |          |
| <b>Trans complementation (pHT315)</b>                          |                                                 |                                                    |          |
| NVH-1473 (1412 pHT315- <i>yndD</i> )                           | 1948 <i>yndpromF</i>                            | ATAGCGGCCGCACGCCTCAAGATCCGAAATA                    | NVH-1378 |
|                                                                | 1946 <i>YndDR</i>                               | ATAGCGGCCGCTTCGTGCCTGACCATCATAA                    |          |
| NVH-1438 (1412 pHT315- <i>yndF<sub>1</sub></i> )               | 1948 <i>yndpromF</i>                            | ATAGCGGCCGCACGCCTCAAGATCCGAAATA                    | NVH-1378 |
|                                                                | 1945 <i>YndF<sub>1</sub>R</i>                   | AATTGCGGCCGCTTCTTCTGTTACTGATCCC                    |          |

| Gene fusions for cis-complementing (pMAD)                            |                              |                                         |                                                  |
|----------------------------------------------------------------------|------------------------------|-----------------------------------------|--------------------------------------------------|
| <b>SLIC 1</b>                                                        | A 1948 yndpromF              | ATAGCGGCCGCACGCCTCAAGATCCGAAATA         | MW3                                              |
|                                                                      | B 1838<br>YndE3_compl_SLIC_B | TTCGTGCCTGACCATCATGCCACTCACTCATCCCCTGC  |                                                  |
|                                                                      | C 1839<br>yndE3_compl_SLIC_C | AGGGGATGAGTGAGTGGCATGATGGTCAGGCACGAAGAG |                                                  |
|                                                                      | D 1700 YndF1RT-PCR R         | TACTGCTCGGCCTGATTCA                     |                                                  |
| <b>promE<sub>3</sub>E<sub>2</sub>E<sub>1</sub>*</b>                  | A 1948 yndpromF              | ATAGCGGCCGCACGCCTCAAGATCCGAAATA         | SLIC 1                                           |
|                                                                      | B 1959 nyE2E1 slicB          | ATTAGAAGTTCTTTAAATAACGGATGGTG           | MW3                                              |
|                                                                      | 1960 nyE2E1 slicC            | TCCGTTATTTAAAGAAGTCTAATCACG             |                                                  |
|                                                                      | 1951 E1 slicD                | CTAGCTTTGCACTGCCTTCTTT                  |                                                  |
| <b>NVH-1421<br/>(1369::yndE<sub>3</sub>)</b>                         | 1948 yndpromF                | ATAGCGGCCGCACGCCTCAAGATCCGAAATA         | promE <sub>3</sub> E <sub>2</sub> E <sub>1</sub> |
|                                                                      | 1963 E <sub>3</sub> R NotI   | TTATGCGGCCGCTCAGCTGATCCCTGT             |                                                  |
| <b>NVH-1416<br/>(1405::yndE<sub>3</sub>E<sub>2</sub>)</b>            | 1948 yndpromF                | ATAGCGGCCGCACGCCTCAAGATCCGAAATA         | promE <sub>3</sub> E <sub>2</sub> E <sub>1</sub> |
|                                                                      | 1962 E <sub>2</sub> R NotI   | ATATGCGGCCGCTTAGTTTTTTTCAAAC            |                                                  |
| <b>NVH-1417<br/>1405::yndE<sub>3</sub>E<sub>2</sub>E<sub>1</sub></b> | 1948 yndpromF                | ATAGCGGCCGCACGCCTCAAGATCCGAAATA         | promE <sub>3</sub> E <sub>2</sub> E <sub>1</sub> |
|                                                                      | 1961 E <sub>1</sub> R NotI   | AATTGCGGCCGCCTAGCTTTGCACTGCCTTCTTT      |                                                  |
| <b>NVH-1413<br/>(1404::yndDE<sub>2</sub>F<sub>1</sub>)</b>           | 1948 yndpromF                | ATAGCGGCCGCACGCCTCAAGATCCGAAATA         | NVH-1369                                         |
|                                                                      | 1945 F <sub>1</sub> R NotI   | AATTGCGGCCGCGTTCTTCTGTACTGATCCC         |                                                  |
| <b>NVH-1427<br/>(1412::yndDF<sub>1</sub>)</b>                        | 1948 yndpromF                | ATAGCGGCCGCACGCCTCAAGATCCGAAATA         | NVH-1378                                         |
|                                                                      | 1945 F <sub>1</sub> R NotI   | AATTGCGGCCGCGTTCTTCTGTACTGATCCC         |                                                  |

\*prom is the 362 bp region upstream of *yndD*

**Table S2.** Percentages of amino acid sequence identity and similarity of Ynd subunits in *B. licheniformis* ATCC15480/DSM13.

| Amino acid sequence alignments        |                         | Identity (%) <sup>a</sup> | Similarity (%) <sup>a</sup> |
|---------------------------------------|-------------------------|---------------------------|-----------------------------|
| <b>YndE<sub>1</sub></b>               | <b>YndE<sub>2</sub></b> | 52                        | 75                          |
| <b>YndE<sub>1</sub></b>               | <b>YndE<sub>3</sub></b> | 54                        | 75                          |
| <b>YndE<sub>2</sub></b>               | <b>YndE<sub>3</sub></b> | 64                        | 83                          |
| <b>YndF<sub>1</sub> (aa 215-398 )</b> | <b>YndF<sub>2</sub></b> | 60                        | 79                          |

<sup>a</sup>Calculated over the full length of the protein
